# Supplementary material for: Study on Regulation Mechanism of Tomato Root Growth in Greenhouse under Cycle Aerated Subsurface Drip Irrigation
Source: MDPI journal article supplement (doi:10.3390/agronomy12112609), 2022-10-24
Supplement: s1 [file s1]

### Supplementary data

Table S1 Sequence of the primers in the experiment for qPCR.

| Gene name                             | Forward Primer 5' → 3'    | Reverse Primer 5' → 3'     |
|---------------------------------------|---------------------------|----------------------------|
| Solyc03g120390.3                      | tcaccaaactatctaaaaaggggg  | tttcattgaaattaaggccggaat   |
| Solyc01g110790.3                      | gttggggaaaagcagaagaagagat | ttgactaagcaagccttgaaataaa  |
| Solyc03g033590.1                      | caaacacataactcaaagtatagcc | acatcataaggaagtcattctcatt  |
| Solyc04g052970.3                      | gtaggagagagccagaagaagaga  | gcaggatgtgagatgaacaaacac   |
| Solyc08g068480.1                      | caaaatccattggtccattagagt  | gcagccccatttcctatgtaagat   |
| Solyc03g096670.3                      | tagtgaagaacgaggttgagagcg  | tcagtggacagaggaattgggaca   |
| Solyc01g087460.3                      | ggcgattcacgtgcagtactcatt  | cctttgctttcgactacctctttt   |
| Solyc08g005610.3                      | tgtggcattgatttcgatatttg   | tttctcgccttcattgctttgtt    |
| Solyc03g005500.1                      | gaggggttcgtgtttggctaggga  | tggcattgatgaagaattgttgta   |
| Solyc01g067540.2                      | gagaacgaggacgtcgtaaacaa   | caaaagggtgaaataagcgaaggga  |
| Solyc01g090370.3                      | aataagggaccccagaggaaag    | gaggaggagacgacgatgaaac     |
| Solyc01g079370.4                      | ccacaagttgccaatgaaagaga   | gccgaaccataagggtgaataaa    |
| Solyc09g064160.3 ( <i>YUCCA5</i> )    | ttccattcccagaacattaccct   | caccaaactccttcaatccatc     |
| Solyc09g091090.2 ( <i>YUCCA2</i> )    | acttcccatttcacaaaacttc    | ctacacactgtcttcaccctcca    |
| Solyc09g073015.1 ( <i>YUCCA10</i> )   | gctttgatctatcgtctccggt    | gaaattttcaaggccttccactt    |
| Solyc06g065630.3 ( <i>YUCCA2.1</i> )  | cacaaaaagcggaggaaacacata  | ttacaacaaccattcaaagatca    |
| Solyc08g065700.3 ( <i>YUCCA10.1</i> ) | ggtttttgttcattaccctttatgc | aaattttcaattcctcccaccttg   |
| Solyc01g080150.3 ( <i>IPT5</i> )      | atttgaaaaaaaagatggtgaagca | aagggaagttgacgatgaaggaggag |
| Solyc09g064910.1 ( <i>IPT</i> )       | actctctatcgacttagccactcaa | ggtacaccgcaacgttcttctctg   |
| Solyc06g071030.3 ( <i>ICS</i> )       | atattgtcatccgtgcaccctactc | attccaaccgcaaattcactctctt  |
| Solyc01g109160.4 ( <i>AOS</i> )       | catacttttcattaccgtttgtc   | catctctcttgatcccactctctc   |
| Solyc02g085730.3 ( <i>AOC</i> )       | ttctccttcccactccatactaccc | ctgattctgtgattctaaatccggt  |
| Solyc08g016720.1 ( <i>NCED5</i> )     | acaatacccccaaaaatcaaccac  | ctccattctgacataaaccat      |
| Solyc04g025650.3 ( <i>ZEP</i> )       | tatctgactggccttcttttgag   | tattgagtatgagcacttgggttt   |
| Solyc02g081190.4 ( <i>ACO</i> )       | acacagtggagaatttaactaaggg | ggaaacaggaagatgtttcaagaag  |
| Solyc02g063540.3 ( <i>ACS</i> )       | ttctccttcccactccatactaccc | ctgattctgtgattctaaatccggt  |
| NM_001330119.1 ( <i>Actin</i> )       | tggtgtgatggtgggtatgggt    | aagaggggcttcagttaggagg     |

Table S2 Impacts of cycle aerated subsurface drip irrigation on plant height and stem diameter in

Tomato

| treatment | Height/cm    | Stem diameter/cm |
|-----------|--------------|------------------|
| O1F2      | 212.5±32.76  | 1.480±0.080      |
| O2F2      | 187.17±21.91 | 1.466±0.065      |
| O3F2      | 186.67±20.34 | 1.455±0.116      |
| SF2       | 177.17±26.72 | 1.421±0.143      |

Table S3 Effects of cycle aerated subsurface drip irrigation on photosynthetic pigment content of

leaves

| Treatment | Chlorophyll a content | Chlorophyll b content | Total chlorophyll |
|-----------|-----------------------|-----------------------|-------------------|
|-----------|-----------------------|-----------------------|-------------------|

|     | (mg·g <sup>-1</sup> ) | (mg·g <sup>-1</sup> ) | content<br>(mg·g <sup>-1</sup> ) |
|-----|-----------------------|-----------------------|----------------------------------|
| HAI | 0.83±0.013            | 0.34±0.077            | 1.17±0.069                       |
| MAI | 0.72±0.018            | 0.26±0.020b           | 0.98±0.031                       |
| LAI | 0.66±0.044            | 0.24±0.020            | 0.90±0.063                       |
| CK  | 0.60±0.093            | 0.22±0.029            | 0.81±0.123                       |

Table S4 Impacts of cycle aerated subsurface drip irrigation on plant dry matter in tomato

| Treatments | Stems dry matter<br>accumulation (g/<br>plant) | Leaves dry matter<br>accumulation (g/<br>plant) | Fruit dry matter<br>accumulation (g/<br>plant) | Total dry matter<br>accumulation (g/<br>plant) |
|------------|------------------------------------------------|-------------------------------------------------|------------------------------------------------|------------------------------------------------|
| HAI        | 39.38±11.43                                    | 44.56±7.45                                      | 3.56±1.29                                      | 89.37±20.03                                    |
| MAI        | 36.39±1.33                                     | 36.82±4.88b                                     | 4.34±0.32                                      | 79.20±13.74                                    |
| LAI        | 30.70±5.88                                     | 38.10±5.46                                      | 2.57±0.19                                      | 72.99±22.17                                    |
| CK         | 26.41±5.39                                     | 37.58±4.59                                      | 2.22±0.17                                      | 67.88±15.60                                    |

Table S5 DEGs analysis of tomato root metabolic pathway under aeration irrigation

| ID               | log2FoldChange | regulated | Gene funtion                                                                 |
|------------------|----------------|-----------|------------------------------------------------------------------------------|
| Solyc01g059965.1 | -2.36          | down      | glucan endo-1,3-beta-glucosidase B                                           |
| Solyc01g080750.3 | -1.938         | down      | crecserin-1                                                                  |
| Solyc01g099910.4 | -1.048         | down      | bifunctional epoxide hydrolase 2                                             |
| Solyc02g080220.3 | -1.517         | down      | pectinesterase-like                                                          |
| Solyc02g087770.3 | -1.133         | down      | aldose 1-epimerase-like                                                      |
| Solyc02g093250.3 | -1.625         | down      | caffeoyl-CoA O-methyltransferase                                             |
| Solyc03g121470.4 | -1.341         | down      | phospholipase D alpha 4                                                      |
| Solyc04g054950.3 | -1.691         | down      | tropinone reductase homolog                                                  |
| Solyc07g005100.4 | -1.21          | down      | chitotriosidase-1                                                            |
| Solyc07g052370.4 | -4.662         | down      | premnaspirodiene oxygenase-like                                              |
| Solyc07g053270.3 | -1.113         | down      | bifunctional riboflavin kinase/FMN<br>phosphatase-like                       |
| Solyc08g079420.3 | -1.903         | down      | ferruginol synthase-like                                                     |
| Solyc09g098320.1 | -2.544         | down      | 12-oxophytodienoate reductase-like protein                                   |
| Solyc10g012370.3 | -1.557         | down      | bifunctional L-3-cyanoalanine<br>synthase/cysteine synthase 1, mitochondrial |
| Solyc11g040340.3 | -1.833         | down      | endo-1,4-beta-D-glucanase precursor                                          |
| Solyc12g049030.1 | -2.248         | down      | delta(12)-fatty-acid desaturase FAD2-like                                    |
| Solyc02g084980.3 | 1.526          | up        | galactinol synthase                                                          |
| Solyc03g031440.4 | 1.233          | up        | NAD(P)H dehydrogenase (quinone)<br>FQR1-like 1                               |
| Solyc03g034220.3 | 2.077          | up        | ribulose biphosphate carboxylase small<br>chain 2A, chloroplastic            |
| Solyc03g083870.4 | 7.605          | up        | Pectin methylesterase inhibitor                                              |
| Solyc05g054350.3 | 1.181          | up        | alpha/beta hydrolase family protein                                          |
| Solyc06g008920.3 | 1.451          | up        | probable acyl-activating enzyme 1,                                           |

|                  |       |    |                                                                |
|------------------|-------|----|----------------------------------------------------------------|
| Solyc06g072740.1 | 1.103 | up | peroxisomal<br>inositol-tetrakisphosphate 1-kinase 5-like      |
| Solyc08g005720.4 | 2.619 | up | santalene and bergamotene synthase,<br>chloroplastic           |
| Solyc08g008430.4 | 1.08  | up | short-chain type<br>dehydrogenase/reductase-like               |
| Solyc09g005690.3 | 1.014 | up | type I inositol polyphosphate 5-phosphatase<br>8 isoform X1    |
| Solyc09g008970.1 | 1.25  | up | uncharacterized protein                                        |
| Solyc09g091030.3 | 1.985 | up | beta-amylase                                                   |
| Solyc10g083990.2 | 1.188 | up | uncharacterized protein                                        |
| Solyc11g010480.2 | 1.046 | up | uncharacterized protein                                        |
| Solyc12g008650.2 | 1.552 | up | myo-inositol oxygenase                                         |
| Solyc12g096800.1 | 4.424 | up | vinorine synthase-like                                         |
| Solyc01g079160.4 | 1.683 | up | GDSL esterase/lipase LIP-4-like                                |
| Solyc01g096280.2 | 3.233 | up | cytochrome P450 78A3-like                                      |
| Solyc01g098490.3 | 2.501 | up | sugar transporter ERD6-like 5                                  |
| Solyc03g026210.4 | 1.081 | up | dihydrodipicolinate reductase-like protein<br>CRR1             |
| Solyc03g097440.3 | 1.895 | up | 11-beta-hydroxysteroid dehydrogenase 1B                        |
| Solyc03g097600.3 | 2.651 | up | bidirectional sugar transporter<br>SWEET10-like                |
| Solyc03g097620.1 | 7.171 | up | bidirectional sugar transporter<br>SWEET14-like                |
| Solyc04g051150.3 | 2.659 | up | sterol 3-beta-glucosyltransferase<br>UGT80A2-like              |
| Solyc07g006870.4 | 3.125 | up | xyloglucan endotransglucosylase/hydrolase<br>protein 25        |
| Solyc07g014680.4 | 2.499 | up | Na <sup>+</sup> transporter                                    |
| Solyc07g062810.4 | 1.563 | up | D-amino-acid transaminase,<br>chloroplastic-like isoform X2    |
| Solyc08g079040.1 | 1.499 | up | probable xyloglucan galactosyltransferase<br>GT19              |
| Solyc09g055860.1 | 2.768 | up | 2,3-bisphosphoglycerate-independent<br>phosphoglycerate mutase |
| Solyc11g005560.3 | 1.141 | up | cellulose synthase A catalytic subunit 5                       |
| Solyc11g066880.2 | 6.872 | up | putative phytosulfokines 6-like precursor                      |

---
